# Supplementary material for: Developmental Stage-Specific Changes in Protein Synthesis Differentially Sensitize Hematopoietic Stem Cells and Erythroid Progenitors to Impaired Ribosome Biogenesis
Source: PubMed Central journal article supplement — Stem Cell Reports. 2021 Jan 12;16(1):20–8. doi: 10.1016/j.stemcr.2020.11.017 (PMC7815942; doi:10.1016/j.stemcr.2020.11.017), 2021-01-12
Supplement: mmc1.pdf [file mmc1.pdf]

**Stem Cell Reports, Volume 16**

**Supplemental Information**

**Developmental Stage-Specific Changes in Protein Synthesis Differentially Sensitize Hematopoietic Stem Cells and Erythroid Progenitors to Impaired Ribosome Biogenesis**

**Jeffrey A. Magee and Robert A.J. Signer**

## SUPPLEMENTAL INFORMATION

### **Developmental stage-specific changes in protein synthesis differentially sensitize hematopoietic stem cells and erythroid progenitors to impaired ribosome biogenesis**

Jeffrey A. Magee<sup>1</sup> and Robert A.J. Signer<sup>2,3</sup>

<sup>1</sup>*Division of Hematology and Oncology, Department of Pediatrics, and Department of Genetics, Washington University School of Medicine, St. Louis, MO, 63110 USA.*

<sup>2</sup>*Division of Regenerative Medicine, Department of Medicine, Moores Cancer Center, University of California San Diego, La Jolla, CA, 92093 USA.*

<sup>3</sup>Correspondence:

Robert A.J. Signer

UC San Diego Moores Cancer Center

3855 Health Sciences Drive

La Jolla, CA 92093-0652

USA

Tel: 858-534-0732

Email: [rsigner@ucsd.edu](mailto:rsigner@ucsd.edu)

Twitter: [@SignerLab](https://twitter.com/SignerLab)

## Supplemental Figures and Legends

### FIGURE S1

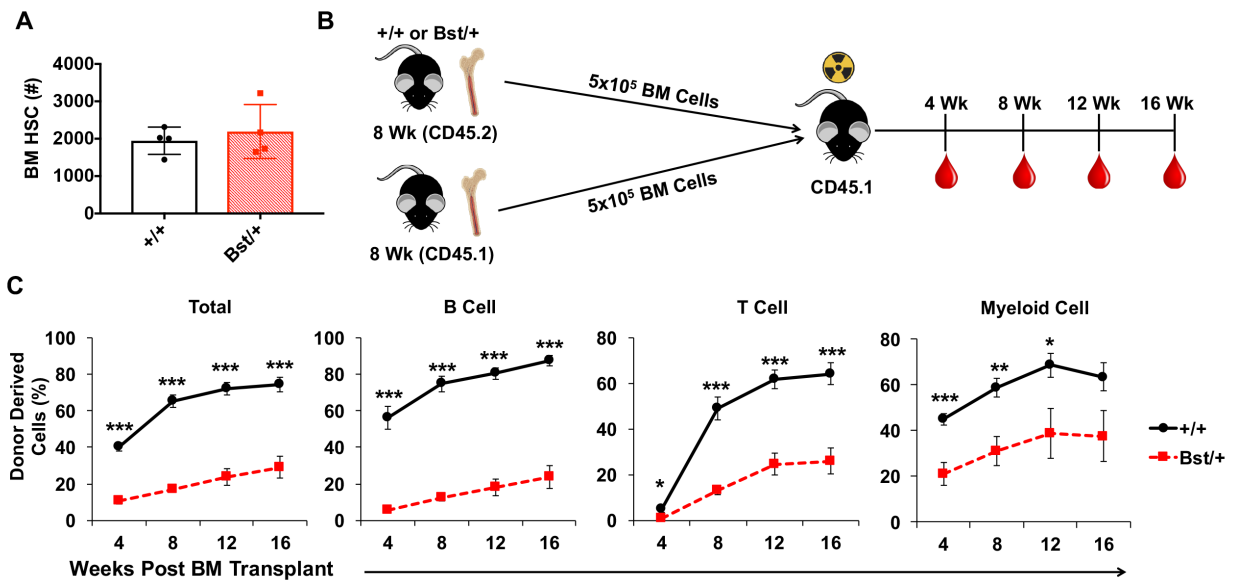

**Figure S1. Young adult *Rpl24*<sup>Bst/+</sup> HSCs have impaired long-term multilineage reconstituting activity. Related to Figure 3.** (A) Absolute number of HSCs in young adult *Rpl24*<sup>Bst/+</sup> and control mice (1 femur + 1 tibia/mouse; N=4 mice/genotype). (B) Diagram of experimental strategy to test long-term multilineage reconstituting activity of young adult *Rpl24*<sup>Bst/+</sup> HSCs. (C) Donor cell engraftment when 5x10<sup>5</sup> *Rpl24*<sup>Bst/+</sup> (Bst/+) or littermate control (+/+) BM cells were transplanted with 5x10<sup>5</sup> recipient-type young adult BM cells into irradiated mice. Total hematopoietic, B-, T- and myeloid cell engraftment is shown 4, 8, 12 and 16 weeks after transplantation (N=5 recipients/genotype). Data represent mean ± SD (A) or SEM (C). Statistical significance was assessed using a two-tailed Student's t-test (\*P<0.05, \*\*P<0.01, \*\*\*P<0.001).

**FIGURE S2**

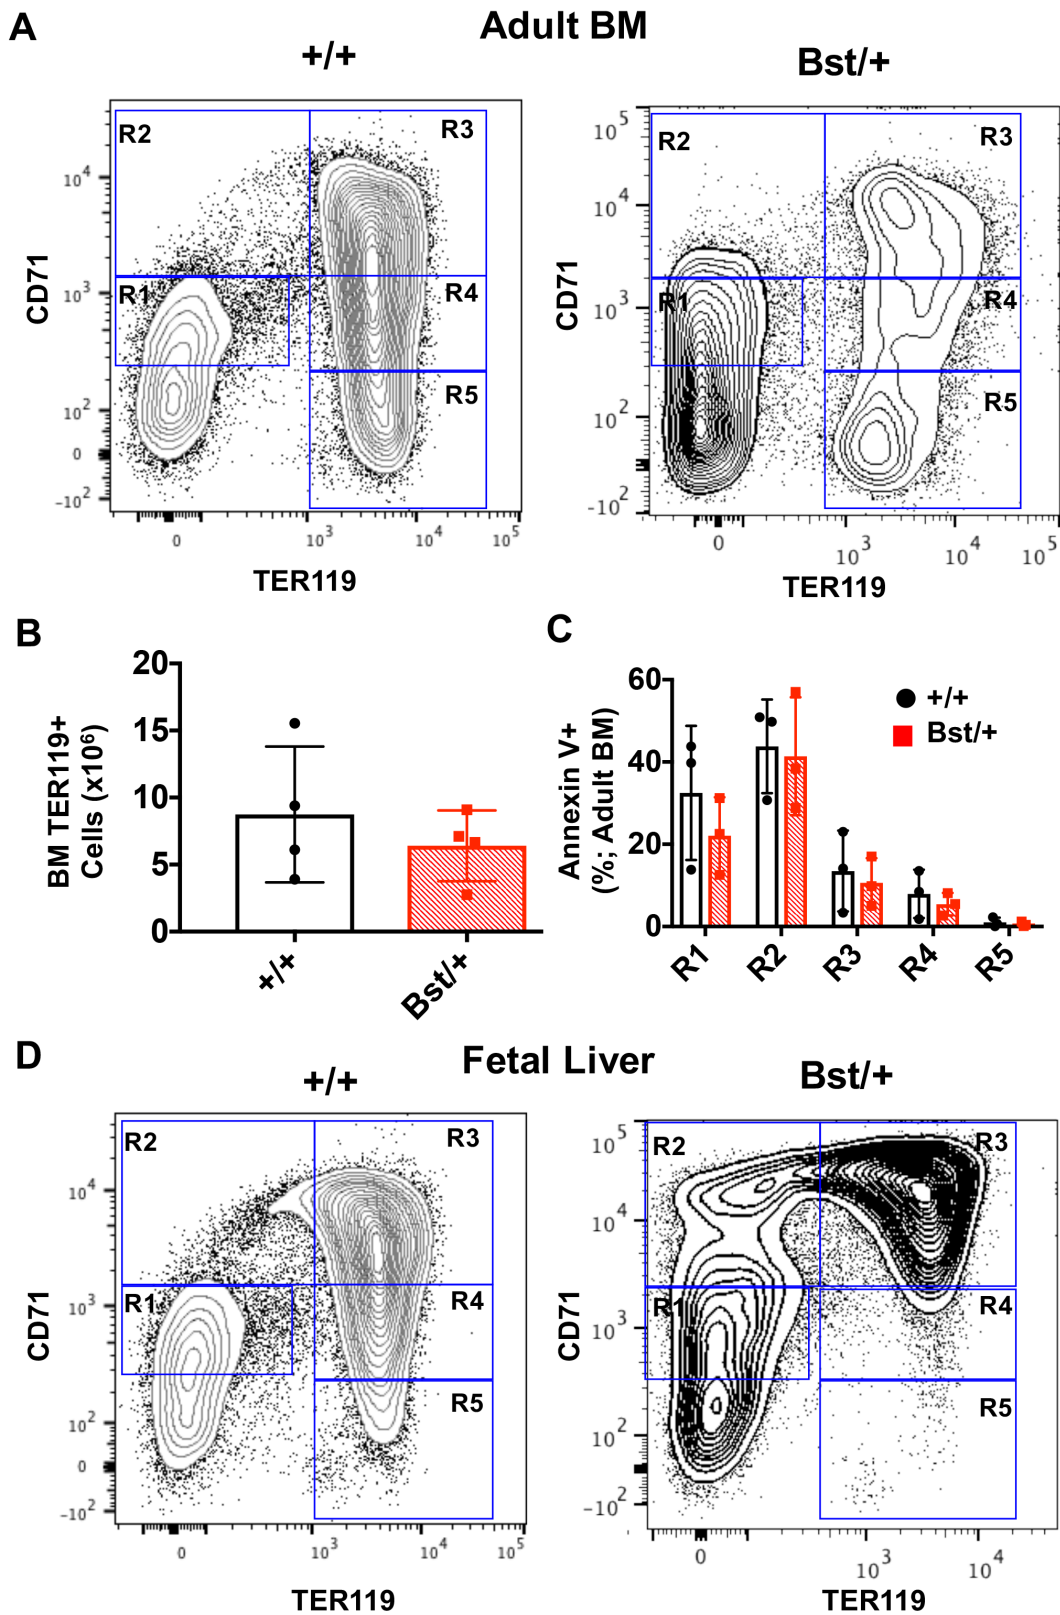

**Figure S2. The *Rpl24*<sup>Bst/+</sup> mutation impairs fetal but not adult erythroid differentiation. Related to Figure 4.** (A) Representative flow cytometry plots of R1-R5 erythroid lineage cells in *Rpl24*<sup>Bst/+</sup> (Bst/+) or control (+/+) young adult BM. (B) Number of TER119<sup>+</sup> cells in *Rpl24*<sup>Bst/+</sup> (Bst/+) or control (+/+) young adult *Rpl24*<sup>Bst/+</sup> (Bst/+) or control (+/+) BM (1 femur + 1 tibia/mouse; n=4 mice/genotype). (C) Frequency of erythroid progenitors that are Annexin V<sup>+</sup> in young adult *Rpl24*<sup>Bst/+</sup> (Bst/+) or control (+/+) BM (N=3 mice/genotype). (D) Representative flow cytometry plots of R1-R5 erythroid lineage cells in *Rpl24*<sup>Bst/+</sup> (Bst/+) or control (+/+) E15.5 fetal liver. Data represent mean ± SD. Statistical significance was assessed using a two-tailed Student's t-test.
